# Supplementary material for: Formation of Au@Pd@Cu core–shell nanorods from Au@Pd nanorods through a new stepwise growth mode
Source: Royal Society of Chemistry journal article supplement (doi:10.1039/c3ce40274f), 2013-01-01
Supplement: c3ce40274f.pdf [file c3ce40274f.pdf]

# Electronic supplementary information

Formation of Au@Pd@Cu core–shell nanorods from Au@Pd nanorods through a new stepwise growth mode

**Masaharu Tsuji,<sup>\*a,b,c</sup> Koji Ikedo,<sup>b</sup> Keiko Uto,<sup>a</sup> Mika Matsunaga,<sup>a</sup> Yuki Yoshida,<sup>c</sup> Koichi Takemura<sup>b</sup> and Yasuro Niidome<sup>d</sup>**

<sup>a</sup> *Institute for Materials Chemistry and Engineering, Kyushu University, Kasuga 816-8580, Japan,*

<sup>b</sup> *Department of Applied Science for Electronics and Materials, Graduate School of Engineering Sciences, Kyushu University, Kasuga 816-8580, Japan,*

<sup>c</sup> *Department of Automotive Science, Graduate School of Integrated Frontier Sciences, Kyushu University, Kasuga, 816-8580, Japan,*

<sup>d</sup> *Department of Applied Chemistry, Faculty of Engineering, Kyushu University, Motooka 744, Nishi-ku, Fukuoka, 819-0395, Japan*

(a) Au@Pd rod

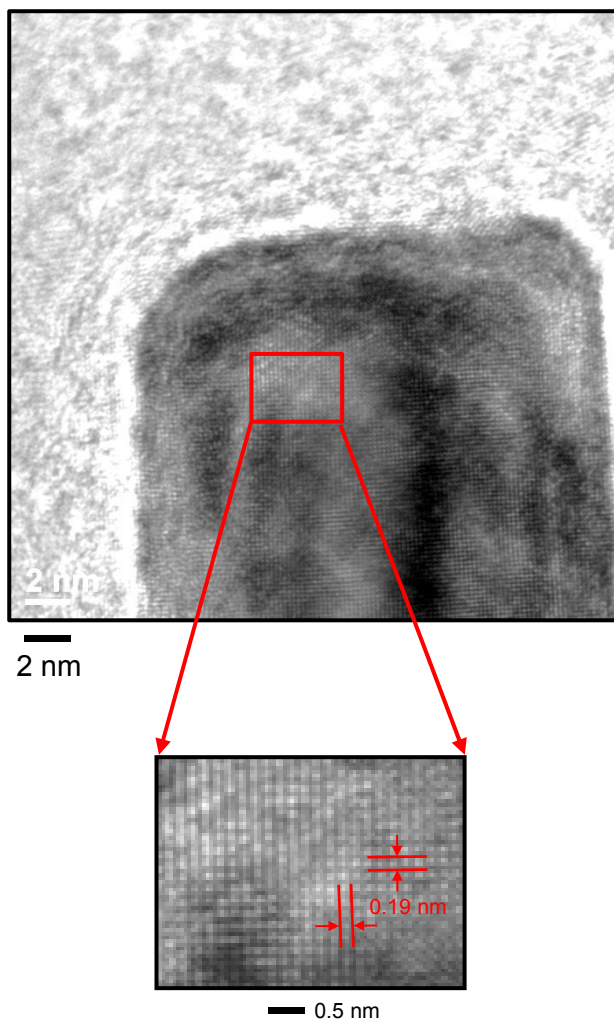

(b) Au@Pd@Cu rod

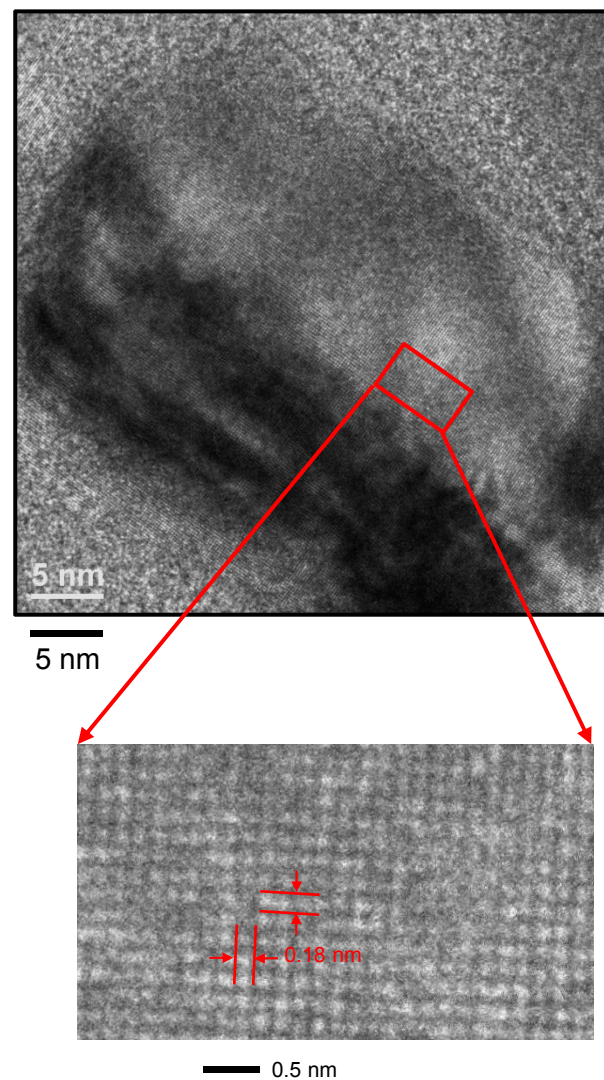

**Fig. S1.** High-resolution TEM images of (a) Au@Pd and (b) Au@Pd@Cu NRs.

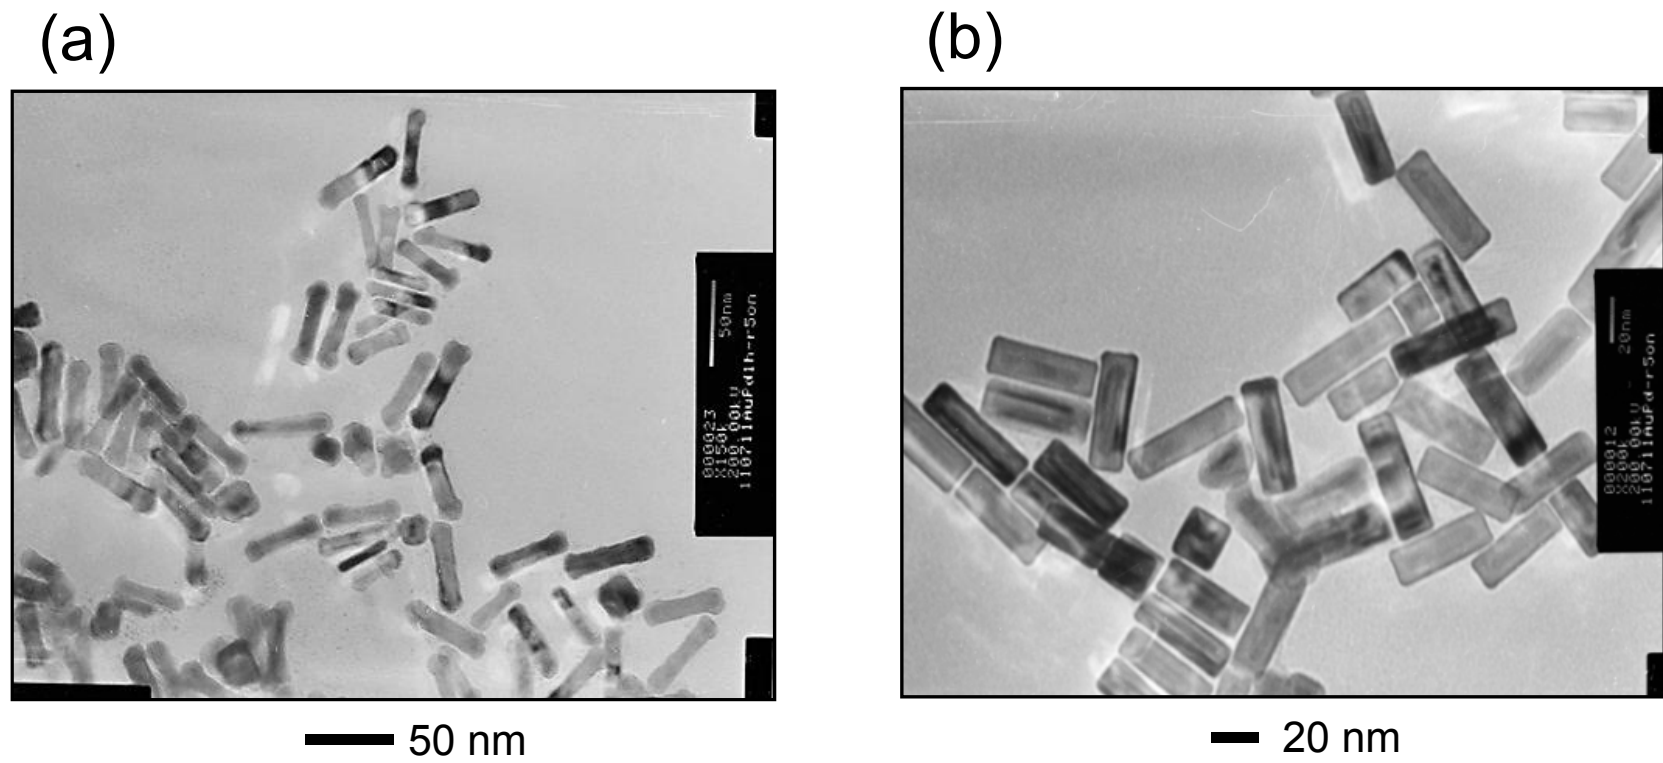

**Fig. S2.** Au@Pd NRs prepared at Pd/Au molar ratio of 5 after (a) 1 and (b) 24 h.

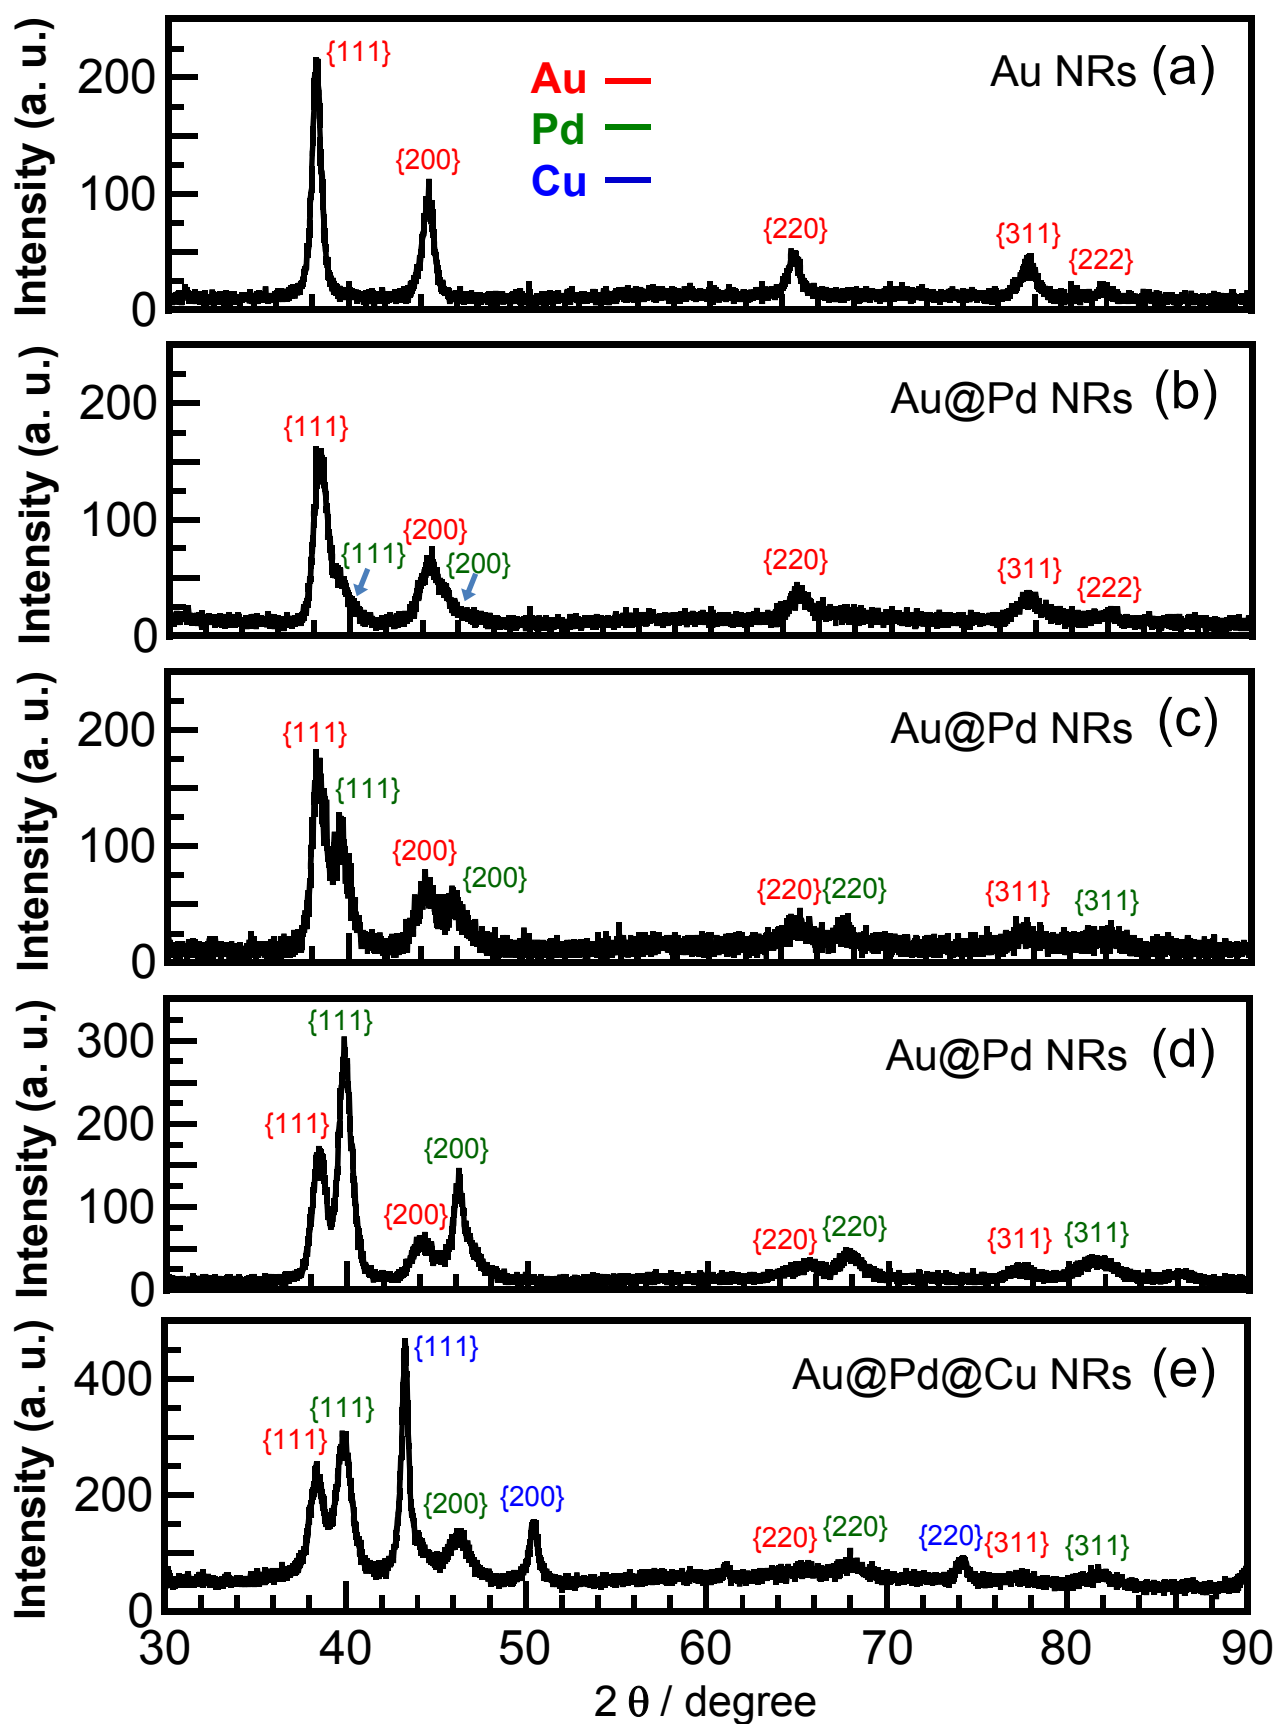

**Fig. S3.** XRD patterns of (a) Au NRs, (b)-(d) Au@Pd NRs prepared at Pd/Au molar ratios of 1, 2.5, and 10, respectively, and (e) Au@Pd@Cu NRs prepared at Cu/Pd/Au molar ratios of 25/5/1.
